# Supplementary material
Source: PubMed Central journal article supplement (PMC7796555)
Supplement: NIHMS1641366-supplement-2.pdf [file NIHMS1641366-supplement-2.pdf]

## Supplementary Information

### Scaffolds with Controlled Release of Pro-Mineralization Exosomes Promoting Craniofacial Bone Healing without Cell Transplantation

W. Benton Swanson, Zhen Zhang, Kemao Xiu, Ting Gong, Miranda Eberle, Ziqi Wang, Peter X. Ma

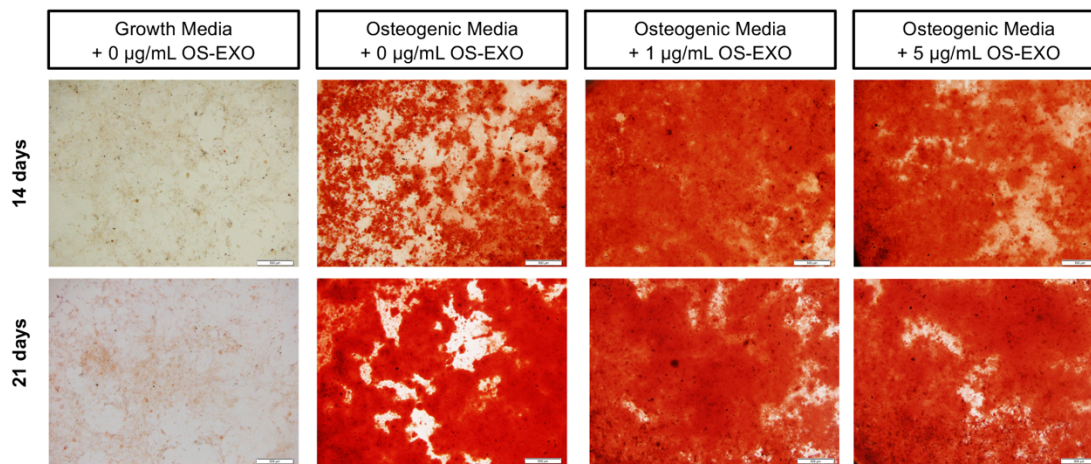

**Sup. Fig. 1.** Evaluating the osteogenic potential of hDPSC-derived exosomes (OS-EXO) in primary human bone marrow stromal cells (hBMSCs). hBMSCs cultured in the presence of exogenous OS-EXO (1 and 5 μg/mL) mineralized significantly more than those cultured in growth or osteogenic media alone, determined by Alizarin Red staining, at 14 and 21 days *in vitro*. Scale bars: 500μm for all images.

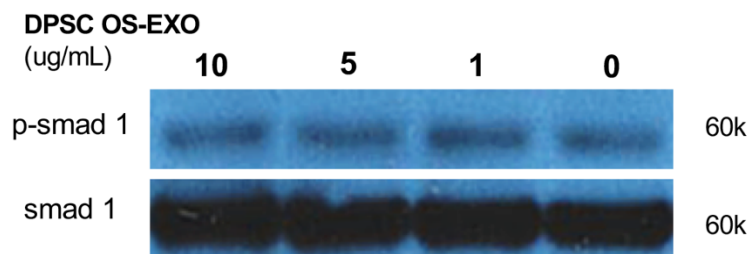

**Sup. Fig. 2.** DPSC OS-EXO treatment of mBMSCs does not upregulate Smad1 phosphorylation, characteristic of canonical BMP signaling.

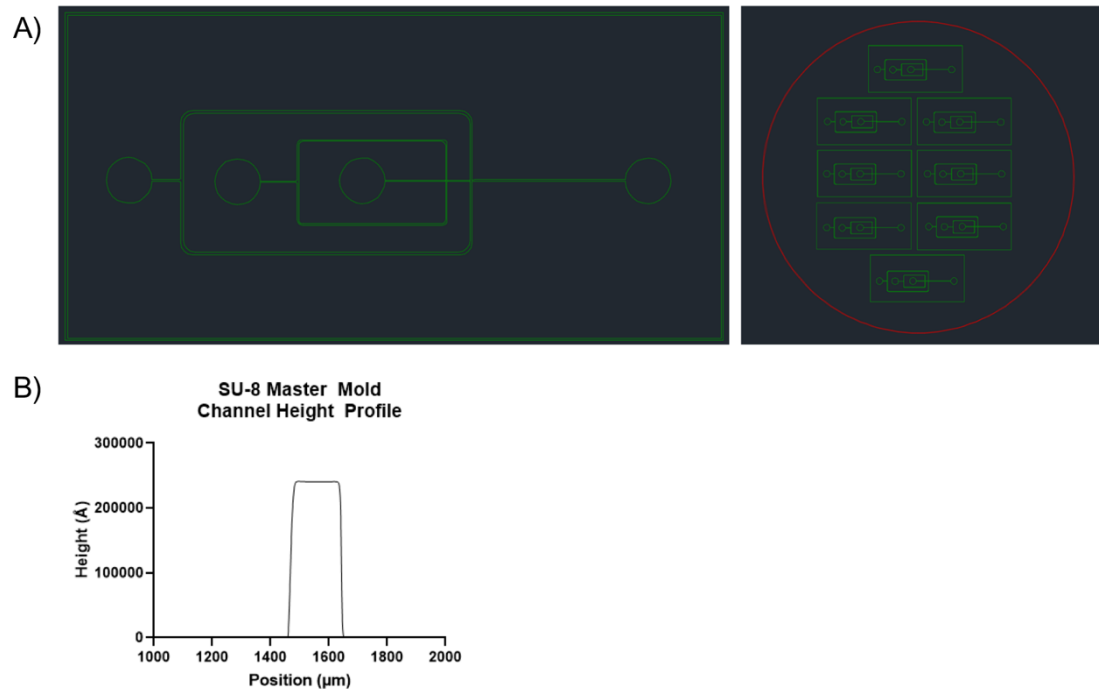

**Sup. Fig. 3.** Computer aided design (CAD) drawing of the dual flow-focusing junction microfluidic device (A) used to generate a mask for photolithography. After exposing and developing SU-8 photoresist, the height of the resulting pattern was measured by profilometer (B), which demonstrates straight side walls and height of  $25\ \mu\text{m}$ .

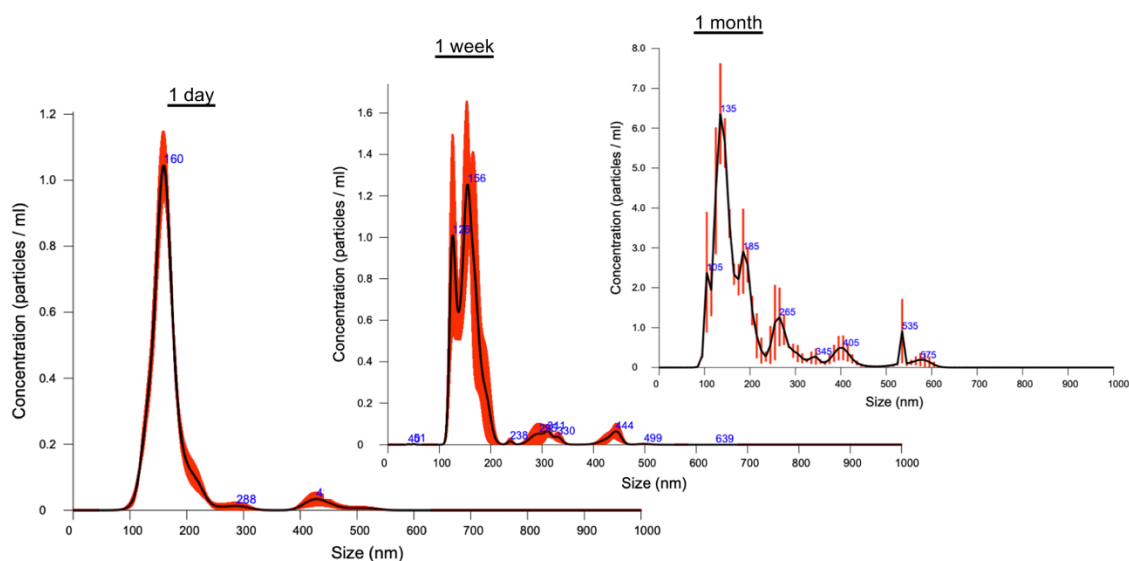

**Sup. Fig. 4.** Nanoparticle tracking analysis at various time points during release: OS-EXO released at 1 day, 1 week, and 1 month. The average hydrodynamic diameter of OS-EXO is similar to freshly isolated virgin OS-EXO (Fig. 1A) and does not change significantly over time, indicating that the exosomes remain stable throughout release.

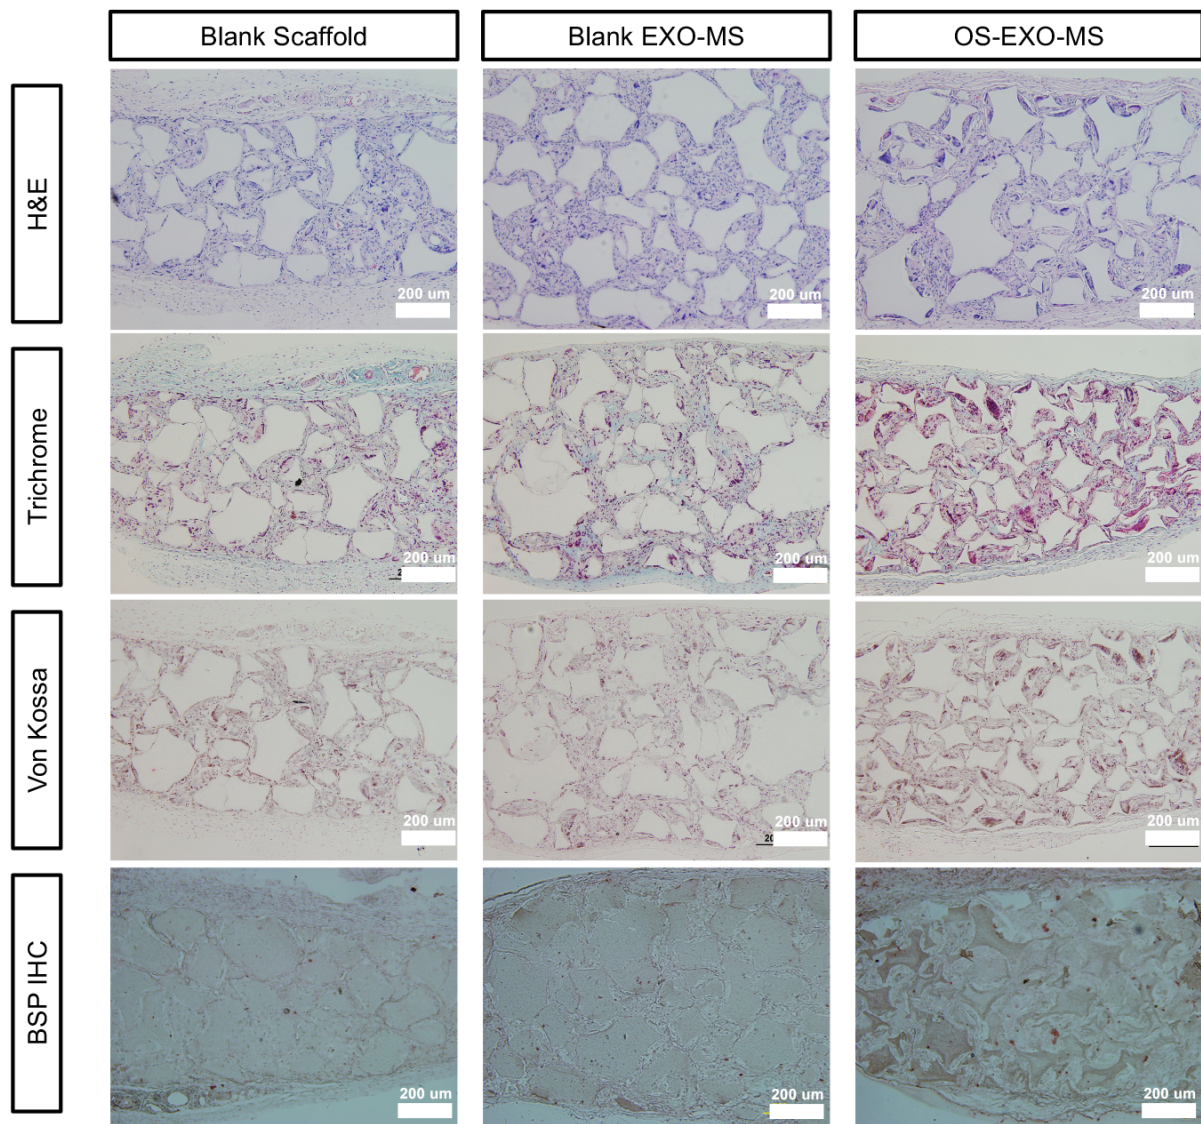

**Sup. Fig. 5.** Low magnification histologic images of subcutaneous explants. Scale bars: 200  $\mu\text{m}$ .

**Sup. Table 1.** List of primer sequences used in quantitative polymerase chain reaction experiments.

| <u>Gene</u> | <u>Forward Sequence</u> | <u>Reverse Sequence</u> | <u>Reference</u>    |
|-------------|-------------------------|-------------------------|---------------------|
| GAPDH       | AGGTCGGTGTGAACGGATTTG   | TGTAGACCATGTAGTTGAGGTCA | Harvard Primer Bank |
| RUNX2       | ATGCTTCATTGCGCTCACAAA   | GCACTCACTGACTCGGTTGG    | Harvard Primer Bank |
| BSP         | CAGGGAGGCAGTGACTCTTC    | AGTGTGGAAAGTGTGGCGTT    | Harvard Primer Bank |
| OCN         | GAACAGACAAGTCCCACACAG   | AGCAGAGTGAGCAGAAAGATG   | IDT Company         |

**Sup. Table 2.** List of antibodies used in immunoprecipitation and immunohistochemistry experiments.

| <u>Antigen</u>              | <u>Manufacturer</u>       | <u>Lot</u> |
|-----------------------------|---------------------------|------------|
| $\beta$ -actin              | Cell Signaling Technology | 8457S      |
| Runx2                       | Cell Signaling Technology | 12556S     |
| OCN                         | Thermo Fisher Scientific  | PA5-86886  |
| BSP                         | Thermo Fisher Scientific  | PA5-79423  |
| Erk1/2                      | Cell Signaling Technology | 9102S      |
| p-Erk1/2                    | Cell Signaling Technology | 9101S      |
| Smad 1                      | Cell Signaling Technology | 6944S      |
| p-Smad 1                    | Cell Signaling Technology | 5753S      |
| 2° Ab<br>(for Western Blot) | Santa Cruz Biotechnology  | SC-2004    |

**Attached separately:**

**Sup. Movie 1** – Particle formation on the microfluidic chip, observed by light microscope.
